# Supplementary material
Source: PubMed Central journal article supplement (PMC3125578)
Supplement: NIHMS305615-supplement-supplementary_data.pdf [file NIHMS305615-supplement-supplementary_data.pdf]

## Online supplemental material

### S1 Figure Legends

**FIGURE S1.** GSK3 inhibitors did not affect survival and proliferation of CD4<sup>+</sup> T cells. *A-B*, CD4<sup>+</sup> T cells were polarized toward Th17 cells for 5 days cultured on irradiated lymph node cells and splenocytes in medium supplemented with 20 ng/mL IL-6 and 5 ng/mL TGFβ, with the indicated GSK3 inhibitors 10 mM LiCl, 1 μM CHIR99021, 1 μM TDZD-8, or 10 μM SB415286. Cells were washed and stimulated for 4 hr with PMA/ionomycin and CD4<sup>+</sup> T cells were analyzed for live-dead staining by flow cytometry. *C*, CD4<sup>+</sup> T cells were polarized toward Th17 cells for 5 days cultured on anti-CD3/CD28 beads in medium supplemented with 20 ng/mL IL-6 and 5 ng/mL TGFβ, with the indicated GSK3 inhibitors 10 mM LiCl, 1 μM CHIR99021, 1 μM TDZD-8, or 10 μM SB415286. Cells were washed and stimulated for 4 hr with PMA/ionomycin and CD4<sup>+</sup> T cells were analyzed by TUNNEL staining by flow cytometry. *D*, CD4<sup>+</sup> T cells were cultured on anti-CD3/CD28 beads for 5 days with the indicated GSK3 inhibitors 10 mM LiCl, 1 μM CHIR99021, 1 μM TDZD-8, or 10 μM SB415286. Cells were washed and stimulated for 4 hr with PMA/ionomycin and CD4<sup>+</sup> T cells were analyzed by TUNNEL staining by flow cytometry. *E*, CD4<sup>+</sup> T cells were polarized toward Th17 cells for 5 days cultured on irradiated lymph node cells and splenocytes in medium supplemented with 20 ng/mL IL-6 and 5 ng/mL TGFβ, with the indicated GSK3 inhibitors 10 mM LiCl, 1 μM CHIR99021, 1 μM TDZD-8, or 10 μM SB415286. Cells were washed and stimulated for 4 hr with PMA/ionomycin and CD4<sup>+</sup> T cells were analyzed for CFSE staining by flow cytometry gated on IL-17A<sup>+</sup> CD4<sup>+</sup> T cells. *F*, CD4<sup>+</sup> T cells were cultured for 5 days on irradiated lymph node cells and splenocytes with the indicated GSK3 inhibitors 10 mM LiCl, 1 μM CHIR99021, 1 μM TDZD-8, or 10 μM SB415286. Cells were washed and stimulated for 4 hr with PMA/ionomycin and CD4<sup>+</sup> T cells were analyzed for CFSE staining by flow cytometry. *G*, GSK3α and GSK3β were knocked down by siRNA with a double-stranded

RNA oligomer labeled with Alexa-Fluor-555 in CD4<sup>+</sup> T cells for 48 h, cells were differentiated on feeder cells for 5 days, and cells were restimulated with ionomycin/PMA for 4 h and analyzed by flow cytometry to evaluate the percentage of siRNA-transfected cells.

**FIGURE S2.** GSK3 inhibitors reduce IL-17A-producing CD4<sup>+</sup> T cells. *A-B*, CD4<sup>+</sup> T cells were polarized toward Th17 cells for 5 days (*A*) with varying concentrations of CHIR99021, or (*B*) with 10 mM lithium added on different days of culture. T cells were recovered and stimulated with PMA/ionomycin for 4 h and IL-17A in the media was measured by ELISA. n=3, \*p<0.05. *C*, CD4<sup>+</sup> T cells were polarized towards Th17 for 5 days, cells were restimulated with ionomycin/PMA/BFA with or without 10 mM LiCl or 1 μM CHIR99021 for 4 h, and IL-17A-producing CD4<sup>+</sup> T cells were analyzed by flow cytometry (n=2). *D*, CD4<sup>+</sup> T cells were polarized towards Th17 cells during culture with anti-CD3/anti-CD28 beads for 5 days with GSK3 inhibitors, followed by measurement of IL-17A-producing CD4<sup>+</sup> T cells by flow cytometry (n=3). *E*, mRNA levels of GSK3β and IL-17A were measured by qRT-PCR after 4 days of polarization towards Th17, with or without 1 μM CHIR99021. *F*, CD4<sup>+</sup> T cells from wild-type and RORγT<sup>+/-</sup> mice were polarized toward Th17 cells for 5 days and analyzed on different days of culture for their content in IL-17A<sup>+</sup> CD4<sup>+</sup> T cells. T cells were recovered and stimulated with PMA/ionomycin for 4 h and IL-17A<sup>+</sup> CD4<sup>+</sup> T cells were analyzed by flow cytometry (n=3), Insert: RORγT was immunoblotted in CD4<sup>+</sup> T cells from wild-type (WT) and RORγT<sup>+/-</sup> mice after 3 days of polarization, or not, towards Th17 cells. Blots were reblotted for the loading control β-actin. *G*, CD4<sup>+</sup> T cells isolated from GSK3 knockin mice were polarized toward Th17 cells for 5 days cultured on irradiated lymph node cells and splenocytes in medium supplemented with 20 ng/mL IL-6 and 5 ng/mL TGFβ with or without 10 μM SB415286. Cells were washed and stimulated for 4 hr with PMA/ionomycin/BFA and IL-17A-producing CD4<sup>+</sup> T cells were analyzed by flow cytometry.

**FIGURE S3.** GSK3 inhibitors reduce responses to IL-6, IL-23, and IL-21. *A*, Chromatin immunoprecipitation of STAT3 on the promoter of *IL-17A* in response to 30 min treatment with 20 ng/mL IL-6 with or without 10 mM LiCl. Q-PCR was applied to quantify the ChIP and input DNA. Values were normalized to input values (\* $p < 0.05$ ,  $n = 3$ ). *B-C*,  $CD4^+$  T cells were polarized towards Th17 cells for 5 days cultured on irradiated lymph node cells and splenocytes in medium supplemented with (*B*) 10 ng/mL IL-23, 20 ng/mL IL-6 and 0.25 ng/mL TGF $\beta$  or (*C*) 75 ng/mL IL-21 and 5 ng/mL TGF $\beta$  with the GSK3 inhibitors 1  $\mu$ M CHIR99021 or 1  $\mu$ M TDZD-8 ( $n = 5$ ). IL-17A-producing  $CD4^+$  T cells were analyzed after 4 h restimulation with PMA/ionomycin/BFA by flow cytometry ( $n = 2-3$ ). *D-E*,  $CD4^+$  T cells were pretreated for 2 h with 10 mM LiCl (Li), 1  $\mu$ M CHIR99021 (CH), or 1  $\mu$ M TDZD-8 (TDZD) and then stimulated for 30 min with (*D*) 10 ng/mL IL-23 or (*E*) 75 ng/mL IL-21, and cell lysates were immunoblotted for phospho-Tyr705-STAT3, STAT3 and  $\beta$ -actin.

**FIGURE S4.** Effects of lithium treatment after Ft LVS or EAE. *A*, The percents of  $CD4^+$  T cells,  $CD8^+$  T cells,  $CD11c^+$  dendritic cells and activated macrophages ( $CD45^{\text{high}}$   $F4/80^+$ ) were determined in spleen cell preparations from lithium-treated or non-treated mice, 6 days after infection with Ft LVS. *B*, The percents of spleen IL-17A-producing, IFN $\gamma$ -producing or FoxP3-expressing  $CD4^+$  T cells were analyzed by flow cytometry after restimulation with PMA/ionomycin/BFA for 4 h or no restimulation (FoxP3). *C*, Spinal cord lysates were immunoblotted for phospho-Tyr705-STAT3, phospho-Tyr701-STAT1, total STAT3, STAT1, and phospho-Ser9-GSK3 $\beta$  ( $n = 2$ ).

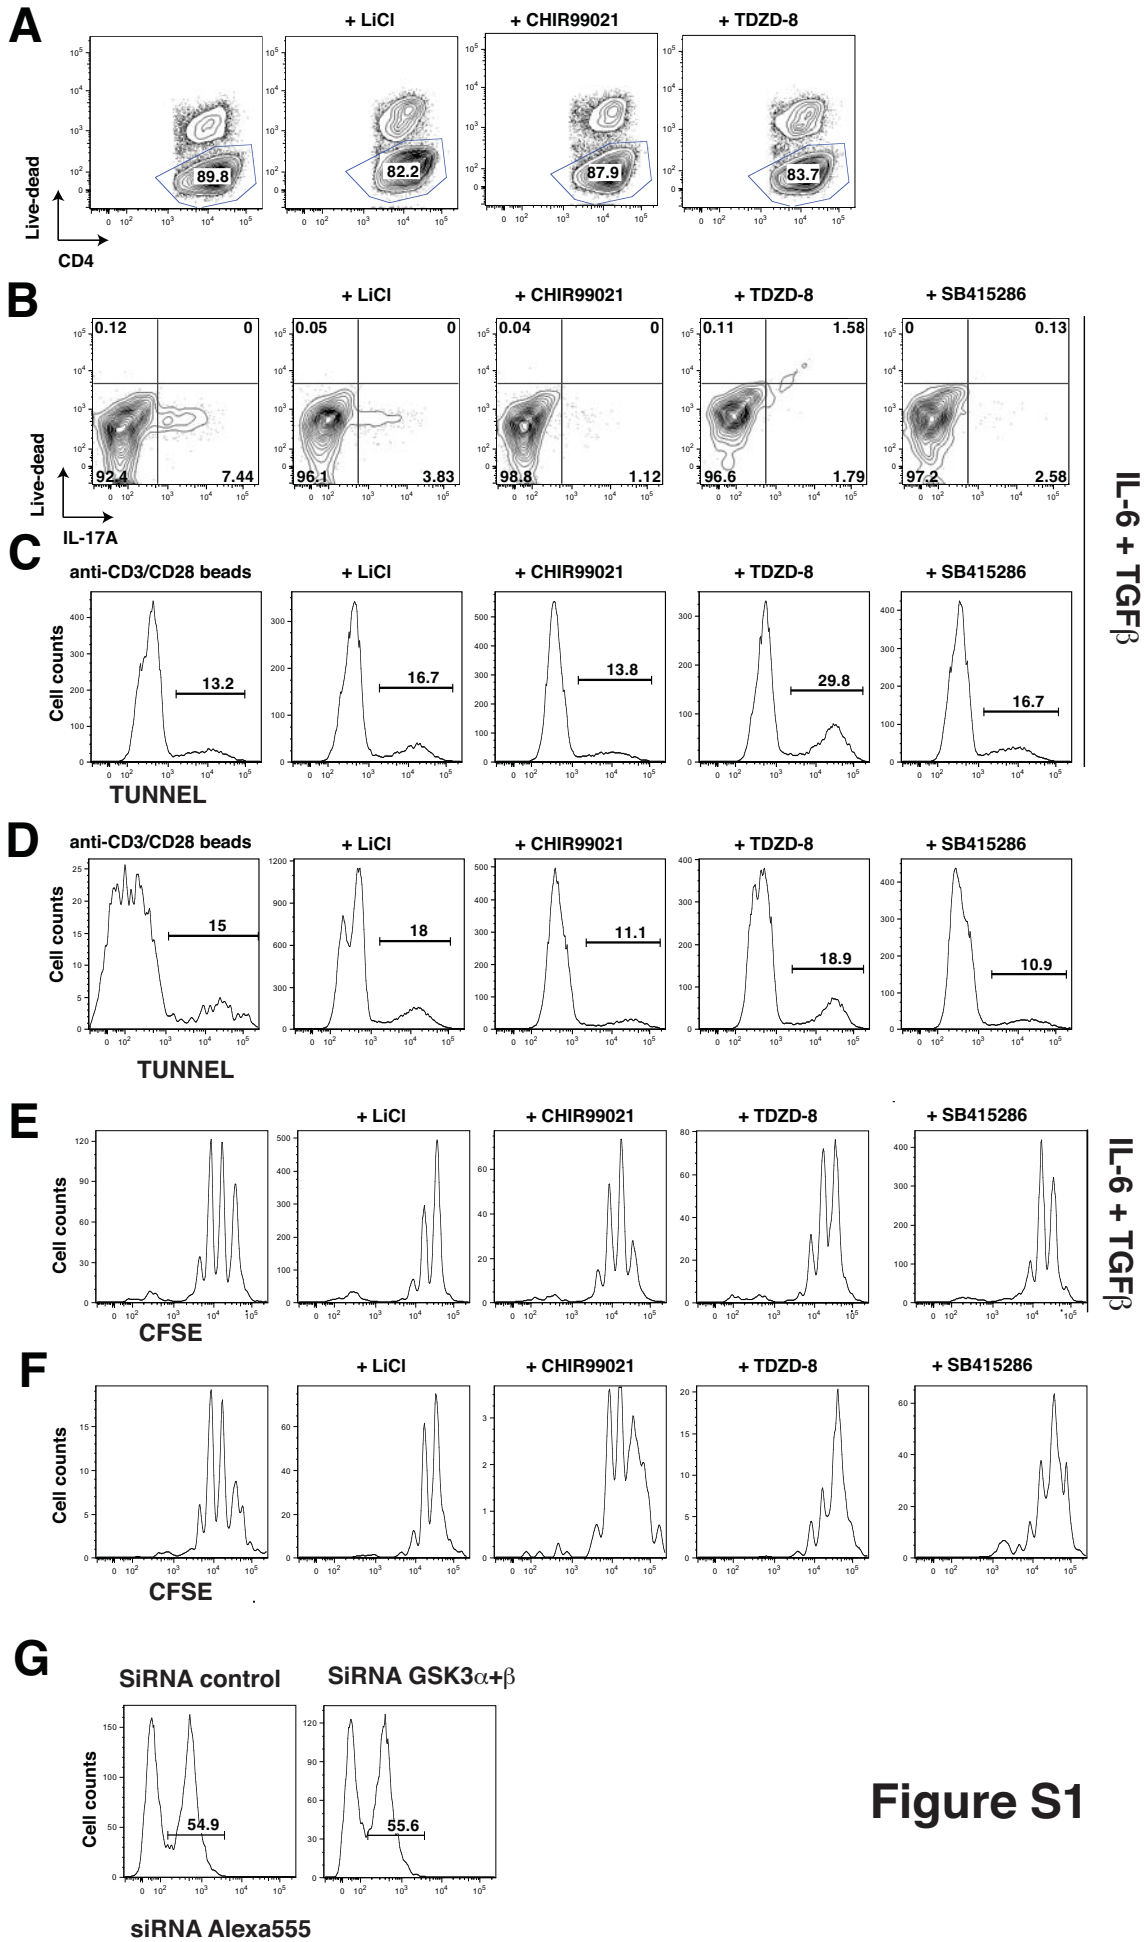

**Figure S1**

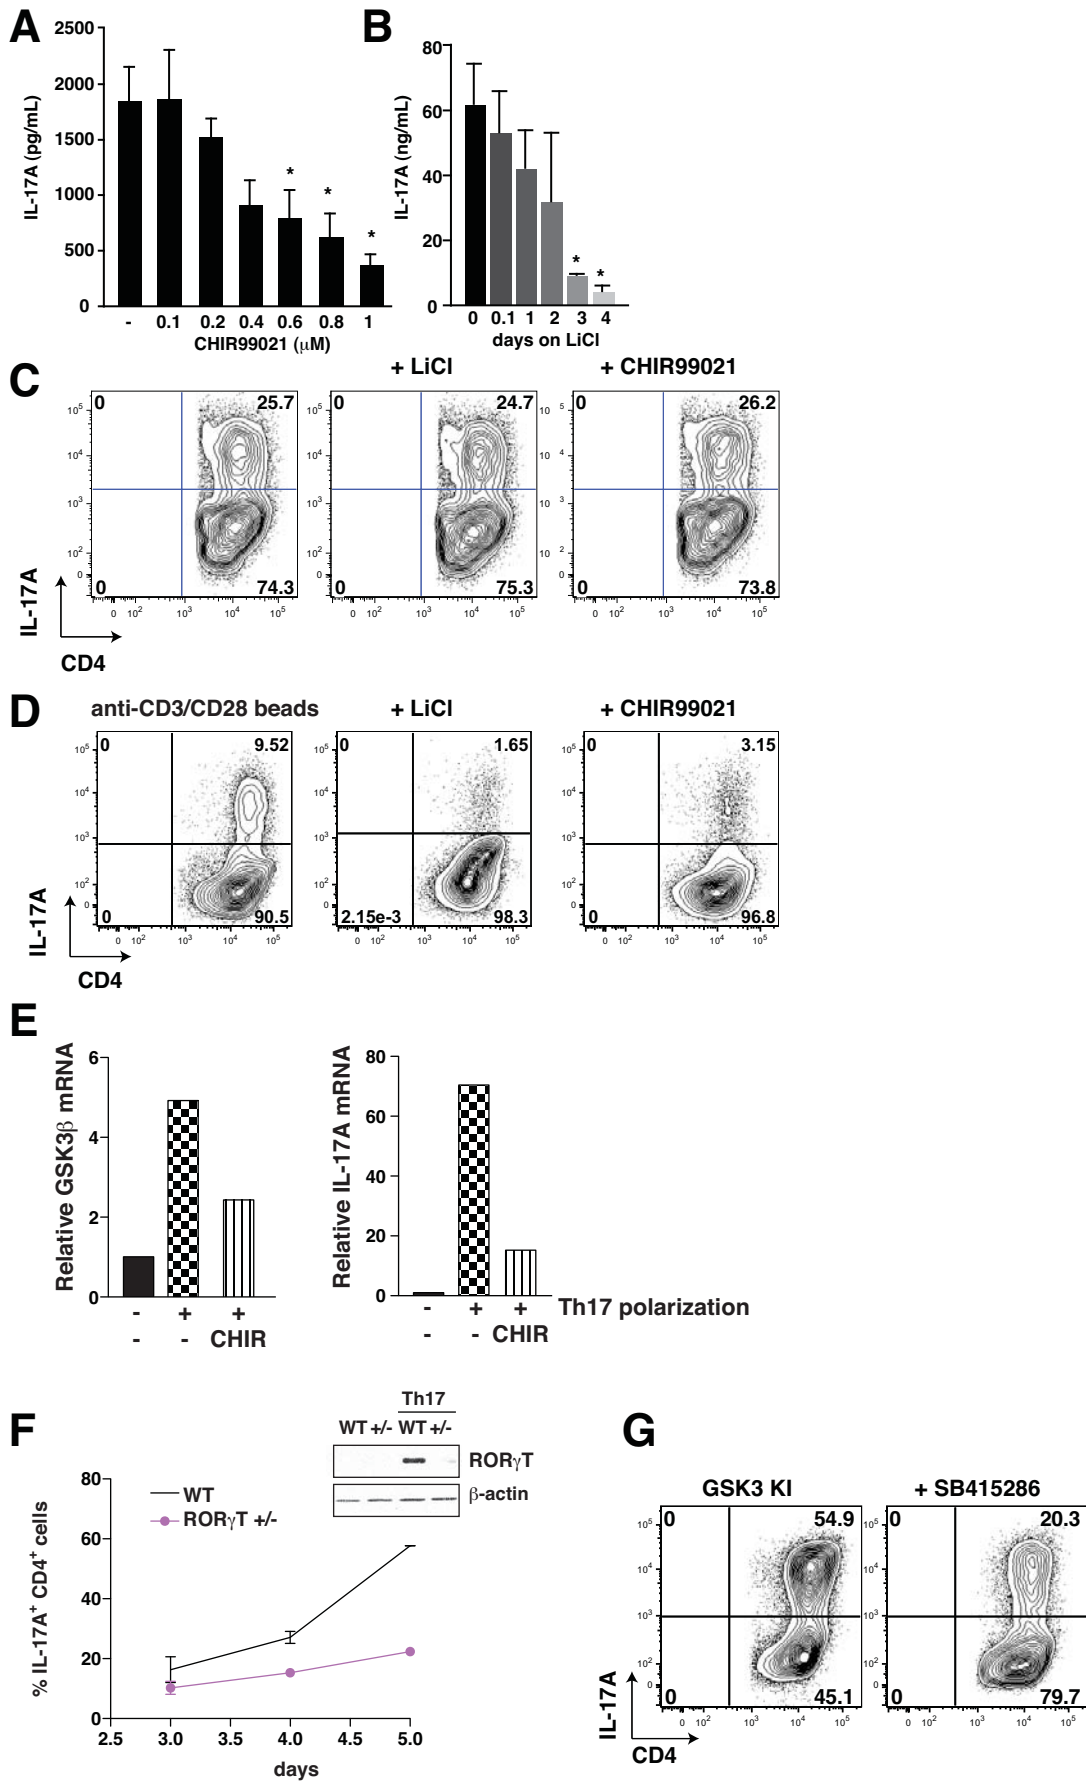

**Figure S2**

**A**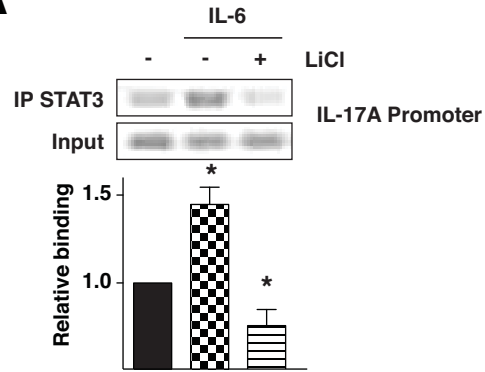**B**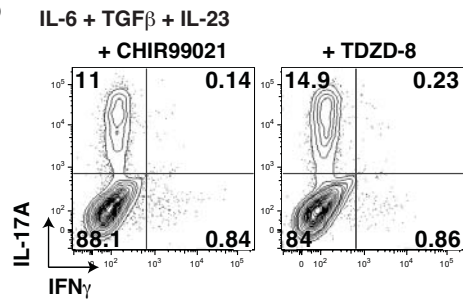**C**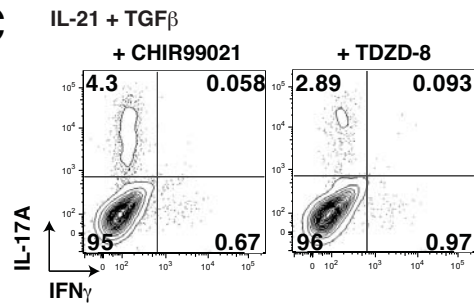**D**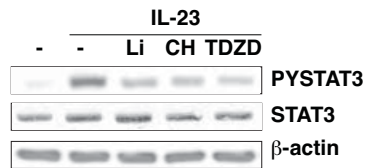**E**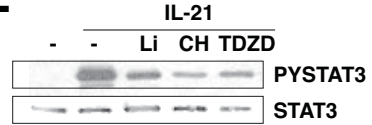**Figure S3**

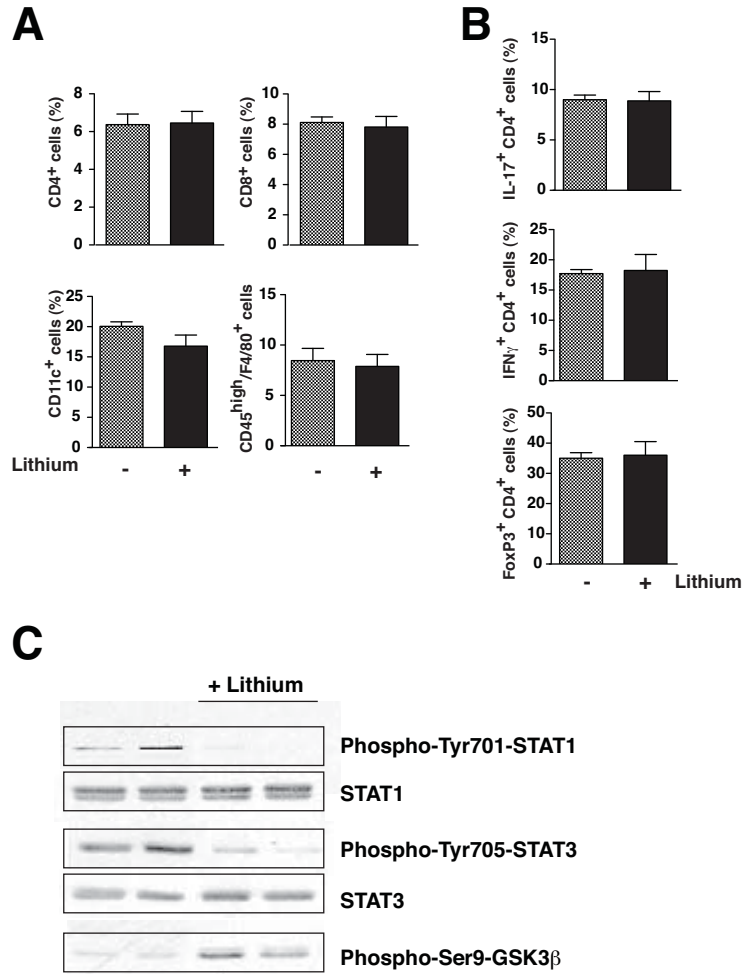

**Figure S4**
